# Supplementary material
Source: MDPI journal article supplement (https://www.mdpi.com/2306-5710/7/3/61)
Supplement: s1 [file s1]

Supplementary Materials

# Analysis of Phytosterols Content in Italian-Standard Espresso Coffee

Franks Kamgang Nzekoue <sup>1</sup>, Laura Alessandroni <sup>1</sup>, Giovanni Caprioli <sup>1,\*</sup>, Gulzhan Khamitova <sup>1</sup>, Luciano Navarini <sup>2</sup>, Massimo Ricciutelli <sup>1</sup>, Gianni Sagratini <sup>1</sup>, Alba Náchér Sempere <sup>3</sup> and Sauro Vittori <sup>1,4,\*</sup>

<sup>1</sup> School of Pharmacy, University of Camerino, Via Sant'Agostino 1, 62032 Camerino, Italy; astride.kamgang@unicam.it (F.K.N.); laura.alessandroni@unicam.it (L.A.); gulzhan.khamitova@unicam.it (G.K.); massimo.ricciutelli@unicam.it (M.R.); gianni.sagratini@unicam.it (G.S.)

<sup>2</sup> Illycaffè S.p.A., Via Flavia 110, 34147 Trieste, Italy; luciano.navarini@illy.com

<sup>3</sup> Institut Educació Secundària Pare Vitoria,AVINGUDA D'ELX, 15, 03801 Alcoi, Spain; al037833@iesparevitoria.com

<sup>4</sup> International Hub for Coffee Research and Innovation, Via Emilio Betti 1, 62020 Belforte del Chienti, Italy

\* Correspondence: giovanni.caprioli@unicam.it (G.C.); sauro.vittori@unicam.it (S.V.); Tel.: +39-0737402238 (G.C.)

**Table S1.** Method validation parameters.

| N° | Compounds            | Conc. Range<br>( $\mu\text{g mL}^{-1}$ ) | Regression<br>Equations <sup>a</sup> | $R^2$ <sup>b</sup> | LODs <sup>c</sup><br>( $\text{ng mL}^{-1}$ ) | LOQs <sup>d</sup><br>( $\text{ng mL}^{-1}$ ) | Reproducibility<br>(RSD <sup>e</sup> %, $n = 3$ ) |                       |
|----|----------------------|------------------------------------------|--------------------------------------|--------------------|----------------------------------------------|----------------------------------------------|---------------------------------------------------|-----------------------|
|    |                      |                                          |                                      |                    |                                              |                                              | Intraday <sup>f</sup>                             | Interday <sup>g</sup> |
| 1  | Cycloartenol         | 0.5–100                                  | $y = 0.04x + 0.0677$                 | 0.998              | 10                                           | 33                                           | 0.1%                                              | 1.3%                  |
| 2  | Campesterol          | 0.5–100                                  | $y = 0.0461x + 0.0209$               | 0.999              | 12                                           | 40                                           | 0.1%                                              | 1.4%                  |
| 3  | Stigmasterol         | 0.5–100                                  | $y = 0.0538x + 0.1197$               | 0.998              | 9                                            | 29                                           | 0.1%                                              | 1.7%                  |
| 4  | $\beta$ - Sitosterol | 0.5–100                                  | $y = 0.0388x + 0.0107$               | 0.999              | 15                                           | 50                                           | 0.5%                                              | 3.9%                  |

<sup>a</sup>  $y$  = concentration,  $\mu\text{g mL}^{-1}$ ;  $x$  = analyte peak area / internal standard peak area; <sup>b</sup>  $R^2$ : Coefficient of determination; <sup>c</sup> LODs: (limit of detection) =  $3 \times$  signal-to-noise (S/N); <sup>d</sup> LOQs: (limit of quantification) =  $10 \times$  signal-to-noise (S/N) ratio; <sup>e</sup> RSD: Relative Standard Deviation; <sup>f</sup> Intraday: Obtained by analyzing 3 times a mixed standard solution at a concentration of  $50 \mu\text{g mL}^{-1}$  on the same day; <sup>g</sup> Interday: Obtained by analyzing standard solutions at a concentration of  $50 \mu\text{g mL}^{-1}$  during 3 consecutive days.
